# Supplementary material for: A Comparison of Solvent-Based Extraction Methods to Assess the Central Carbon Metabolites in Mouse Bone and Muscle
Source: MDPI journal article supplement (doi:10.3390/metabo12050453), 2022-05-18
Supplement: s1 [file s1]

## Supplementary information

**Supplementary Table S1:** List of metabolite derivatives and their biological group used for reference search. MeOX: Methoxyamine hydrochloride. PPP: Pentose phosphate pathway. SCFA: short chain fatty acid. TCA: Tricarboxylic acid cycle. TMS: Trimethylsilyl derivatives.

| Biological group    | Metabolite                 | Detected as          |
|---------------------|----------------------------|----------------------|
| Amino acid          | Alanine                    | 2TMS or 3TMS         |
| Amino acid          | Asparagine                 | 2TMS                 |
| Amino acid          | Aspartic acid              | 2TMS or 3TMS         |
| Amino acid          | Cysteine                   | 3TMS                 |
| Amino acid          | Glycine                    | 2TMS or 3TMS         |
| Amino acid          | Isoleucine                 | 1TMS or 2TMS         |
| Amino acid          | Leucine                    | 1TMS or 2TMS         |
| Amino acid          | Lysine                     | 3TMS                 |
| Amino acid          | Methionine                 | 1TMS or 2TMS         |
| Amino acid          | Phenylalanine              | 1TMS or 2TMS         |
| Amino acid          | Proline                    | 1TMS or 2TMS         |
| Amino acid          | Serine                     | 2TMS or 3TMS or 4TMS |
| Amino acid          | Threonine                  | 2TMS or 3TMS         |
| Amino acid          | Tryptophan                 | 2TMS                 |
| Amino acid          | Tyrosine                   | 3TMS                 |
| Amino acid          | Valine                     | 1TMS                 |
| Amino acid          | Glutamine                  | 1TMS                 |
| Amino acid          | Homocysteine               | 3TMS                 |
| Amino acid          | Arginine                   | 1TMS                 |
| Amino acid          | Glucosamine N-acetyl       | 1MeOx 5TMS           |
| Amino acid derivate | Pyroglutamic acid          | 2TMS                 |
| Glycolysis          | Fructose-6-phosphate       | 1MeOx 6TMS           |
| Glycolysis          | Glucose-6-phosphate        | 1MeOx 6TMS           |
| Glycolysis          | Glyceric acid-3-phosphate  | 4TMS                 |
| Glycolysis          | Lactic acid                | 2TMS                 |
| Glycolysis          | Phosphoenolpyruvic acid    | 3TMS                 |
| Glycolysis          | Pyruvic acid               | 1MeOx 1TMS           |
| Glycolysis          | Putrescine                 | 3TMS or 4TMS         |
| TCA                 | Citric acid                | 4TMS                 |
| TCA                 | Fumaric acid               | 2TMS                 |
| TCA                 | 2-hydroxy glutaric acid    | 3TMS                 |
| TCA                 | 2-oxo glutaric acid        | 1MeOx 2TMS           |
| TCA                 | Malic acid                 | 3TMS                 |
| TCA                 | Succinic acid              | 2TMS                 |
| TCA                 | Isocitric acid             | 1MeOx 5TMS           |
| TCA                 | Aconitic acid              | 3TMS                 |
| Others (Nucleotide) | Adenine                    | 2TMS                 |
| Others (Nucleotide) | Uracil                     | 2TMS                 |
| Others (Nucleotide) | Uridine                    | 3TMS                 |
| Others (Nucleobase) | Adenosine                  | 3TMS or 4TMS         |
| Others (Nucleobase) | Cytosine                   | 2TMS                 |
| Others (Nucleobase) | Thymine                    | 2TMS                 |
| Others (Glycerol)   | Dihydroxyacetone phosphate | 1MeOx 3TMS           |

|                          |                           |              |
|--------------------------|---------------------------|--------------|
| Others (Glycerol)        | Glycerol                  | 3TMS         |
| Others (Glycerol)        | Glycerol-3-phosphate      | 4TMS         |
| Others (Glycerol)        | Glyceric acid             | 3TMS         |
| Others (SCFA)            | 3-hydroxy butanoic acid   | 2TMS         |
| Others (SCFA)            | 4-amino butanoic acid     | 3TMS         |
| Others (SCFA)            | 2-amino butanoic acid     | 2TMS         |
| Others (Sugar alcohol)   | Erythritol                | 4TMS         |
| Others (Sugar alcohol)   | Arabitol                  | 5TMS         |
| Others (Alcohol)         | Thymine                   | 2TMS         |
| Others (Alcohol)         | Sorbitol                  | 1TMS         |
| Others (Carboxylic acid) | Glutaric acid             | 2TMS         |
| Others (PPP)             | Ribose-5-phosphate        | 1MeOx 5TMS   |
| Others (PPP)             | Ribose                    | 1MeOx 4TMS   |
| Others (PPP)             | Ribulose-5-phosphate      | 1MeOx 5TMS   |
| Others (PPP)             | Ribitol                   | 5TMS         |
| Others (PPP)             | Erythrose-4-phosphate     | 1MeOx 4TMS   |
| Others (PPP)             | Gluconic acid 6-phosphate | 7TMS         |
| Others (Urea cycle)      | Urea                      | 2TMS         |
| Others (Urea cycle)      | Ornithine                 | 3TMS or 4TMS |
| Others (Sugar)           | Trehalose                 | 8TMS         |
| Others (Sugar)           | Sucrose                   | 8TMS         |
| Others (Sugar)           | Mannose                   | 1MeOx 5TMS   |
| Others (Sugar)           | Maltose                   | 1MeOx 8TMS   |
| Others (Sugar)           | Glucose                   | 1MeOx 5TMS   |
| Others (Sugar)           | Galactitol                | 6TMS         |
| Others (Sugar)           | Acetyl-galactosamine      | 1MeOx 4TMS   |
| Others (Hydrocarbons)    | Xylose                    | 1MeOx 4TMS   |
| Others (Hydrocarbons)    | Hypotaurine               | 3TMS         |
| Others (Vitamin)         | Pantothenic acid          | 3TMS         |
| Others                   | Maleic Acid               | 3TMS         |
| Others                   | Ethanolaminephosphate     | 4TMS         |

**Supplementary Table S2:** List of metabolite's RSD values obtained for each of the protocols performed in bone and muscle tissue.

| Metabolite    | Bone RSD |         |      | Muscle RSD |         |      |
|---------------|----------|---------|------|------------|---------|------|
|               | mBD      | mBD-low | mMat | mBD        | mBD-low | mMat |
| Alanine       | 37       | 18      | 8    | 33         | 42      | 64   |
| Asparagine    | NA       | NA      | NA   | NA         | NA      | NA   |
| Aspartic acid | 25       | 14      | 15   | 28         | 64      | 40   |
| Cysteine      | 17       | 8       | 10   | 25         | 59      | NA   |
| Glycine       | 30       | 15      | 25   | 18         | 17      | 67   |
| Isoleucine    | 17       | NA      | NA   | 60         | NA      | 54   |
| Leucine       | 32       | 15      | 23   | 45         | 66      | NA   |
| Lysine        | 43       | 9       | 20   | 58         | 63      | 20   |
| Methionine    | 13       | 35      | 26   | 25         | 34      | 52   |
| Phenylalanine | 13       | 50      | 29   | 48         | 48      | 46   |
| Proline       | 34       | 61      | 51   | 89         | 58      | 53   |
| Serine        | 25       | NA      | NA   | 32         | 61      | 56   |
| Threonine     | 45       | 44      | 44   | 28         | 37      | 16   |

|                            |    |    |    |     |    |    |
|----------------------------|----|----|----|-----|----|----|
| Tryptophan                 | 15 | 12 | 10 | 67  | 63 | 39 |
| Tyrosine                   | 26 | 22 | 22 | 63  | 35 | 87 |
| Valine                     | 14 | 27 | 30 | 67  | 40 | 61 |
| Glutamine                  | NA | NA | NA | NA  | NA | NA |
| Homocysteine               | 33 | 23 | 52 | 25  | 36 | 26 |
| Arginine                   | NA | NA | NA | NA  | NA | NA |
| Glucosamine N-acetyl       | 4  | 10 | 21 | NA  | NA | NA |
| Pyroglutamic acid          | 26 | 15 | 14 | 3   | 11 | 59 |
| Fructose-6-phosphate       | 25 | 33 | 8  | 95  | 69 | 37 |
| Glucose-6-phosphate        | 23 | 20 | 24 | 45  | 60 | NA |
| Glyceric acid-3-phosphate  | 32 | NA | NA | 41  | 86 | NA |
| Lactic acid                | 11 | 4  | 8  | 65  | 7  | 55 |
| Phosphoenolpyruvic acid    | 9  | 45 | 46 | 29  | 18 | 57 |
| Pyruvic acid               | 18 | 26 | 77 | 29  | 88 | 8  |
| Putrescine                 | 50 | 31 | 58 | 45  | 55 | 47 |
| Citric acid                | 4  | 16 | 3  | 32  | 56 | 58 |
| Fumaric acid               | 4  | 4  | 6  | 21  | 58 | 25 |
| 2-hydroxy glutaric acid    | 1  | 13 | 2  | 12  | 15 | 96 |
| 2-oxo glutaric acid        | 8  | NA | NA | 36  | NA | 25 |
| Malic acid                 | 3  | 4  | 4  | 15  | 19 | 23 |
| Succinic acid              | 4  | 4  | 5  | 67  | 60 | 70 |
| Isocitric acid             | 4  | 17 | 3  | 32  | 55 | 58 |
| Aconitic acid              | NA | NA | NA | NA  | NA | NA |
| Adenine                    | NA | NA | NA | NA  | NA | NA |
| Uracil                     | 5  | 27 | 21 | 21  | 58 | 42 |
| Uridine                    | 10 | 12 | 5  | 31  | 59 | 35 |
| Adenosine                  | 37 | 18 | 8  | 28  | 7  | 24 |
| Cytosine                   | 31 | 39 | 15 | 27  | 14 | 34 |
| Thymine                    | 10 | 33 | 15 | 35  | 46 | NA |
| Dihydroxyacetone phosphate | 30 | 46 | 59 | 36  | NA | NA |
| Glycerol                   | 3  | 4  | 4  | 59  | 82 | 21 |
| Glycerol-3-phosphate       | 9  | 13 | 19 | 55  | 37 | 82 |
| Glyceric acid              | 4  | 7  | 2  | 13  | 77 | 27 |
| 3-hydroxy butanoic acid    | 8  | 18 | 22 | 67  | 20 | 42 |
| 4-amino butanoic acid      | NA | NA | NA | NA  | NA | NA |
| 2-amino butanoic acid      | 16 | 24 | NA | 86  | 74 | 54 |
| Erythritol                 | NA | NA | NA | NA  | NA | NA |
| Arabitol                   | NA | NA | NA | NA  | NA | NA |
| Thymine                    | 10 | 33 | 15 | 35  | 46 | NA |
| Sorbitol                   | NA | NA | NA | NA  | NA | NA |
| Glutaric acid              | 35 | 31 | 3  | 20  | 21 | 24 |
| Ribose-5-phosphate         | 33 | 79 | 69 | 56  | 24 | 9  |
| Ribose                     | 6  | 4  | 3  | 59  | NA | 57 |
| Ribulose-5-phosphate       | 16 | 10 | 7  | 97  | 75 | 22 |
| Ribitol                    | 4  | 18 | 10 | 56  | 83 | 93 |
| Erythrose-4-phosphate      | 29 | 5  | 1  | 112 | 84 | NA |
| Gluconic acid 6-phosphate  | 13 | 23 | 6  | NA  | NA | NA |
| Urea                       | 4  | 11 | 17 | 23  | 10 | 68 |
| Ornithine                  | 27 | 60 | 27 | 50  | 69 | 81 |
| Trehalose                  | 5  | 64 | 5  | 8   | 23 | 60 |
| Sucrose                    | 16 | 23 | NA | 24  | 28 | 52 |

|                       |    |    |    |    |    |    |
|-----------------------|----|----|----|----|----|----|
| Mannose               | 1  | 4  | 1  | 17 | 53 | 11 |
| Maltose               | 4  | NA | 9  | NA | NA | NA |
| Glucose               | 2  | 5  | 1  | NA | NA | NA |
| Galactitol            | 3  | 22 | 15 | 13 | 13 | 21 |
| Acetyl-galactosamine  | 4  | 10 | 21 | NA | NA | NA |
| Xylose                | NA | NA | NA | NA | NA | NA |
| Hypotaurine           | 24 | 29 | 25 | 37 | 18 | 61 |
| Pantothenic acid      | 52 | 57 | 8  | 19 | 16 | 34 |
| Maleic Acid           | 3  | 4  | 4  | 18 | 20 | 73 |
| Ethanolaminephosphate | 24 | 21 | 15 | 51 | 35 | 30 |
